# Supplementary material for: Pathway-Based Genome-Wide Association Studies for Two Meat Production Traits in Simmental Cattle
Source: PubMed Central journal article supplement (PMC4682090; doi:10.1038/srep18389), 2015-12-17
Supplement: srep18389-s1.pdf [file srep18389-s1.pdf]

# Pathway-Based Genome-Wide Association Studies for Two Meat Production Traits in Simmental Cattle

Huizhong Fan<sup>1</sup>, Yang Wu<sup>1</sup>, Xiaojing Zhou<sup>2</sup>, Jiangwei Xia<sup>1</sup>, Wengang Zhang<sup>1</sup>, Yuxin Song<sup>1</sup>, Fei Liu<sup>1,3</sup>, Yan Chen<sup>1</sup>, Lupei Zhang<sup>1</sup>, Xue Gao<sup>1</sup>, Huijiang Gao<sup>1\*</sup>, and Junya Li<sup>1\*</sup>

1. Institute of Animal Science, Chinese Academy of Agricultural Science, Beijing 100193, China
2. Department of Mathematics, Heilongjiang Bayi Agricultural University, 163319 Daqing, China
3. College of Animal Science and Technology, Agricultural University of Hebei Province, Baoding, 071001, China

\*Corresponding author: Huijiang Gao. Email: gaohj111@sina.com

Junya Li. Email: JL1@iascaas.net.cn

## Emails of the other authors:

Huizhong Fan: [fanhuizhong1990@qq.com](mailto:fanhuizhong1990@qq.com)

Yang Wu: [wuyangf7@126.com](mailto:wuyangf7@126.com)

Xiaojing Zhou: 964703463@qq.com

Jiangwei Xia: [290466673@qq.com](mailto:290466673@qq.com)

Wengang Zhang: [1015210729@qq.com](mailto:1015210729@qq.com)

Yuxin Song: 2361278555@qq.com

Fei Liu: [liufeiyjy@163.com](mailto:liufeiyjy@163.com)

Yan Chen: chenyan0204@163.com

Lupei Zhang: [lpzhang@iascaas.net.cn](mailto:lpzhang@iascaas.net.cn)

Xue Gao: gaoxue76@126.com

**Table S2: The result of significant pathways (P<0.01) discovered by Smallest P-value method and SSEA method.**

| Method                  | Trait | Pathway  | Description                               | ES   | NES  | P value   | FDR  |
|-------------------------|-------|----------|-------------------------------------------|------|------|-----------|------|
| Smallest P-value method | LW    | bta04727 | GABAergic synapse                         | 0.35 | 2.76 | 1.121E-04 | 0.26 |
|                         | LMA   | bta04932 | Non-alcoholic fatty liver disease (NAFLD) | 0.30 | 3.16 | 1.837E-04 | 0.14 |
| SSEA method             | LW    | bta04727 | GABAergic synapse                         | 0.38 | 2.99 | 3.061E-04 | 0.21 |
|                         | LMA   | bta04932 | Non-alcoholic fatty liver disease (NAFLD) | 0.35 | 3.47 | 2.177E-05 | 0.08 |
|                         |       | bta04060 | Cytokine-cytokine receptor interaction    | 0.30 | 2.53 | 7.533E-02 | 0.25 |

LW, live weight; LMA, longissimus muscle area. ES, enrichment score; NES, normalized enrichment score; FDR, false discovery rate.
